# Supplementary material for: Impact of DNA methylation on the recurrence risk of stage I non-small cell lung cancer with EGFR mutations
Source: Research Square preprint supplement (doi:10.21203/rs.3.rs-5808504/v1), 2025-05-06
Supplement: Supplementary file 1 [file 4e170abd82f7fa0ce923f30d.docx]

### Supplemental Table S1. Primers and probes of MOB-qMSP.

| **Gene** | **Forward 5' - 3'** | **Reverse 5' - 3'** | **Probe 5'** | **Size (bp)** | **Tm (℃)** |
| --- | --- | --- | --- | --- | --- |
| CDO1 | CGTTTTTTTTCGTTTTATTTTCGTCG | CCTCCGACCCTTTTTATCTACG | TGTGGTTCGCGACGTTGGGACGT | 69 | 60 |
| TAC1 | TCGGGTTATTTCGTTTCGTATTTGTTC | CACTATCCCTCGCCGCAACG | AGGTGGTCGCGTTGGGGGCGTCGT | 69 | 60 |
| SOX17 | TAGGTGTAGTTTTGGGCGCG | ATCCAACCCCACGCCCG | CGGGGGAGGGGTAAGGGGCGGGCG | 59 | 60 |
| p16 | TCGGTTTTCGATCGTAATTATTCG | CGAATAAAAAAAATACGAACGCTACTAAAA | TGCGTTGGGTAGCGTTTTCGTTTTTAGTAGCG | 76 | 60 |
| HOXA7 | GTGGTTTCGTTTCGTAGGGTTCG | CCGCCAACTAAACGCTCCC | GCGGAAAAAGATTTGGAGGTTTCGCGGGAG | 148 | 60 |
| CDH13 | TCGGGGTTTTCGGTCGCG | ACTCGAAATAACCTCCCTACCG | CGGCGGCGAAGATAGATCGGGGTTCG | 62 | 60 |
| RASSF1A | ATTGAGTTGCGGGAGTTGGT | ACACGCTCCAACCGAATACG | CCCTTCCCAACGCGCCCA | 65 | 60 |
| APC | CGTTGGATGCGGATTAGGGCG | TATCGATCACGTACGCCCACA | TATTTTCGTCGGGAGTTCGTCGATTGGTTGGGT | 79 | 60 |
| ACTB | TAGGGAGTATATAGGTTGGGGAAGTT | AACACACAATAACAAACACAAATTCAC | CGACTGCGTGTGGGGTGGTGATGGAGGAGGTTTAGGCAGTCG | 103 | 60 |

Supplemental Table S2. Differential gene methylation patterns across various sample combinations.

|  | **Tumor + N1LNs** | | |  | **Tumor + N2LNs** | | |  | **Tumor + N1LNs + N2LNs** | | |
| --- | --- | --- | --- | --- | --- | --- | --- | --- | --- | --- | --- |
|  | **Non-Rec** | **Rec** | ***p-value*** |  | **Non-Rec** | **Rec** | ***p-value*** |  | **Non-Rec** | **Rec** | ***p-value*** |
| **CDO1** |  |  |  |  |  |  |  |  |  |  |  |
| No | 53 (34.0%) | 48 (55.8%) | **0.004** |  | 43 (27.6%) | 47 (54.7%) | **<0.001** |  | 56 (35.9%) | 53 (61.6%) | **<0.001** |
| Yes | 103 (66.0%) | 38 (44.2%) |  | 113 (72.4%) | 39 (45.3%) |  | 100 (64.1%) | 33 (38.4%) |
| **TAC1** |  |  |  |  |  |  |  |  |  |  |  |
| No | 39 (25.0%) | 36 (41.9%) | **0.025** |  | 34 (21.8%) | 30 (34.9%) | 0.087 |  | 42 (26.9%) | 41 (47.7%) | **0.005** |
| Yes | 117 (75.0%) | 50 (58.1%) |  | 122 (78.2%) | 56 (65.1%) |  | 114 (73.1%) | 45 (52.3%) |
| **SOX17** |  |  |  |  |  |  |  |  |  |  |  |
| No | 73 (46.8%) | 48 (55.8%) | 0.406 |  | 73 (46.8%) | 45 (52.3%) | 0.712 |  | 76 (48.7%) | 51 (59.3%) | 0.288 |
| Yes | 83 (53.2%) | 38 (44.2%) |  | 83 (53.2%) | 41 (47.7%) |  | 80 (51.3%) | 35 (40.7%) |
| **p16** |  |  |  |  |  |  |  |  |  |  |  |
| No | 149 (95.5%) | 70 (81.4%) | **0.002** |  | 150 (96.2%) | 62 (72.1%) | **<0.001** |  | 150 (96.2%) | 70 (81.4%) | **<0.001** |
| Yes | 7 (4.5%) | 16 (18.6%) |  | 6 (3.8%) | 24 (27.9%) |  | 6 (3.8%) | 16 (18.6%) |
| **RASSF1A** |  |  |  |  |  |  |  |  |  |  |  |
| No | 90 (57.7%) | 56 (65.1%) | 0.528 |  | 85 (54.5%) | 54 (62.8%) | 0.458 |  | 93 (59.6%) | 57 (66.3%) | 0.593 |
| Yes | 66 (42.3%) | 30 (34.9%) |  | 71 (45.5%) | 32 (37.2%) |  | 63 (40.4%) | 29 (33.7%) |
| **CDH13** |  |  |  |  |  |  |  |  |  |  |  |
| No | 110 (70.5%) | 56 (65.1%) | 0.687 |  | 111 (71.2%) | 40 (46.5%) | **<0.001** |  | 121 (77.6%) | 61 (70.9%) | 0.520 |
| Yes | 46 (29.5%) | 30 (34.9%) |  | 45 (28.8%) | 46 (53.5%) |  | 35 (22.4%) | 25 (29.1%) |
| **APC** |  |  |  |  |  |  |  |  |  |  |  |
| No | 86 (55.1%) | 53 (61.6%) | 0.619 |  | 85 (54.5%) | 54 (62.8%) | 0.458 |  | 106 (67.9%) | 54 (62.8%) | 0.720 |
| Yes | 70 (44.9%) | 33 (38.4%) |  | 71 (45.5%) | 32 (37.2%) |  | 50 (32.1%) | 32 (37.2%) |
| **HOXA7** |  |  |  |  |  |  |  |  |  |  |  |
| No | 145 (92.9%) | 79 (91.9%) | 0.953 |  | 144 (92.3%) | 78 (90.7%) | 0.910 |  | 146 (93.6%) | 80 (93.0%) | 0.986 |
| Yes | 11 (7.1%) | 7 (8.1%) |  | 12 (7.7%) | 8 (9.3%) |  | 10 (6.4%) | 6 (7.0%) |

Supplemental Table S3. The chromosomal ranges, unconverted original DNA sequences, and bisulfite-converted primer and probe sequences used in MOB-qMSP.

| **Genes** | **Chromosomal Ranges** | **Unconverted Original DNA Sequences** | **Bisulfite-converted Primer and Probe Sequences** |
| --- | --- | --- | --- |
| CDO1: **[Chromosome 5](http://www.ensembl.org/Homo_sapiens/contigview?chr=5&region=&start=115816926&end=115816995)**  (length: 69bp) | 115816926-115816995 | CGCCTCTCCCCGCTCCACCTCCGCCGCTGTGGTTCGCGACGCTGGGACGTAGACAAAAAGGGTCGGAGG | CGTTTTTTTTCGTTTTATTTTCGTCGTTGTGGTTCGCGACGTTGGGACGTAGATAAAAAGGGTCGGAGG |
| TAC1: **[Chromosome 7](http://www.ensembl.org/Homo_sapiens/contigview?chr=7&region=&start=97732227&end=97732296)**  (length: 69bp) | 97732227-97732296 | CCGGGTCACCCCGCCCCGCATCTGTCCGAGGTGGCCGCGCTGGGGGCGCCGCTGCGGCGAGGGACAGTG | TCGGGTTATTTCGTTTCGTATTTGTTCGAGGTGGTCGCGTTGGGGGCGTCGTTGCGGCGAGGGATAGTG |
| SOX17: **[Chromosome 8](http://www.ensembl.org/Homo_sapiens/contigview?chr=8&region=&start=54457757&end=54457816)**  (length: 59bp) | 54457757-54457816 | CAGGTGTAGCCTTGGGCGCGGGGCCGGGGGAGGGGCAAGGGGCGGGCGTGGGGTTGGAC | TAGGTGTAGTTTTGGGCGCGGGGTCGGGGGAGGGGTAAGGGGCGGGCGTGGGGTTGGAT |
| **CDH13: [Chromosome 16](http://www.ensembl.org/Homo_sapiens/contigview?chr=16&region=&start=82627227&end=82627289)**  (length: 62bp) | 82627228-82627289 | TCGGGGCCTCCGGTCGCGGCGGCGAAGACAGATCGGGGCTCGGTAGGGAGGTCATTCCGAGC | TCGGGGTTTTCGGTCGCGGCGGCGAAGATAGATCGGGGTTCGGTAGGGAGGTTATTTCGAGT |
| RASSF1A: **[Chromosome 3](http://www.ensembl.org/Homo_sapiens/contigview?chr=3&region=&start=50340719&end=50340784)**  (length: 65bp) | 50340719-50340784 | GGCACGCTCCAGCCGGGTGCGGCCCTTCCCAGCGCGCCCAGCGGGTGCCAGCTCCCGCAGCTCAAT | ACACGCTCCAACCGAATACGACCCTTCCCAACGCGCCCAACGAATACCAACTCCCGCAACTCAAT |
| p16: **[Chromosome 9](http://www.ensembl.org/Homo_sapiens/contigview?chr=9&region=&start=21974682&end=21974758)**  (length: 76bp) | 50340719-50340784 | TCGGCCTCCGACCGTAACTATTCGGTGCGTTGGGCAGCGCCCCCGCCTCCAGCAGCGCCCGCACCTCCTCTACCCG | TCGGTTTTCGATCGTAATTATTCGGTGCGTTGGGTAGCGTTTTCGTTTTTAGTAGCGTTCGTATTTTTTTTATTCG |
| HOXA7: **[Chromosome 7](http://www.ensembl.org/Homo_sapiens/contigview?chr=7&region=&start=27156725&end=27156872)**  (length:148bp) | 27156725-27156872 | GTGGTCTCGCTCCGCAGGGCCCGCAGCCGCCTAGAATGGAAGGGCAAGAGGCTCAAATATGCGGCCAAAGAATCCGCCCGCGCCCGGCGGGCCTGGCGCGTCCCGCGGAAAAAGACCTGGAGGCTCCGCGGGAGCGCCCAGCTGGCGG | GTGGTTTCGTTTCGTAGGGTTCGTAGTCGTTTAGAATGGAAGGGTAAGAGGTTTAAATATGCGGTTAAAGAATTCGTTCGCGTTCGGCGGGTTTGGCGCGTTTCCGGGGGAGGGGTAAGGGGCGGGCGCGTTTAGTTGGCGG |
| APC: **[Chromosome 5](http://www.ensembl.org/Homo_sapiens/contigview?chr=5&region=&start=112737772&end=112737851)**  (length: 79bp) | 112737772-112737851 | CCGCTGGATGCGGACCAGGGCGCTCCCCATTCCCGTCGGGAGCCCGCCGATTGGCTGGGTGTGGGCGCACGTGACCGACA | CGTTGGATGCGGATTAGGGCGTTTTTTATTTTCGTCGGGAGTTCGTCGATTGGTTGGGTGTGGGCGTACGTGATCGATA |
| ACTB: **[Chromosome 7](http://www.ensembl.org/Homo_sapiens/contigview?chr=7&region=&start=5532168&end=5532271)**  (length: 103bp) | 5532169-5532271 | AGCACACAGTGGCAGACACAGGTTCACAGTCCAGAAGACTTGCTGAGCCTCCTCCATCACCACCCCACGCAAGGGCAAACTTCCCCAGCCTGTATACTCCCTG | AACACACAATAACAAACACAAATTCACAATCCAAAAAACTTACTAAACCTCCTCCATCACCACCCCACGCAAAAACAAACTTCCCCAACCTATATACTCCCTA |
